# Supplementary material
Source: publisher figshare collection journal article supplement (https://gsapubs.figshare.com/ndownloader/files/22233528)
Supplement: Supplementary file 1 [file 22233528]

## Sheet: Grt
Sample	BA3	BA3	BA3	BA7	BA7	BA7	BA7	BA7	BA7	BA7
Type	Gran. Grt	Gran. Grt	Gran. Grt	Gran. Grt	Gran. Grt	Gran. Grt	Incl. Pyr.	Incl. Pyr.	Pst	Pst
Mineral	Grt	Grt	Grt	Grt	Grt	Grt	Grt	Grt	Grt	Grt
SiO2	41.02	40.84	40.93	40.48	41.22	40.6	39.56	39.72	39.4	39.04
TiO2	0.1165	0.0767	0.1048	0.0205	0.0415	0.0306	0.1331	0.1082	0.0726	0.4129
Al2O3	23.04	23.02	23.01	22.87	22.79	23.09	21.96	22.18	21.96	21.87
FeO	14.9	15.74	15.43	15.94	15.73	15.67	15.95	15.11	20.17	19.91
MnO	0.221	0.2357	0.2473	0.2502	0.2533	0.2503	0.2459	0.2322	0.465	0.4458
MgO	14.48	14.31	14.55	14.03	14.21	13.63	7.99	8.11	5.97	6.51
CaO	6.76	6.4	6.39	6.3	6.32	6.95	14.17	14.21	12.27	11.81
Na2O	0.0323	0.0262	0.0124	0.0092	0.0722	0.0152	0.0173	0.0223	0.0296	0.0238
Total	100.58	100.664	100.683	99.9315	100.658	100.245	100.039	99.718	100.356	100.063
Structural formula (12 O)
Si	2.9931	2.987	2.9883	2.9867	3.0126	2.9859	2.9894	2.998	3.0101	2.9882
Ti	0.0064	0.0042	0.0058	0.0011	0.0023	0.0017	0.0076	0.0061	0.0042	0.0238
Al	1.9814	1.9843	1.98	1.9887	1.963	2.0014	1.9557	1.9731	1.9773	1.9729
Fe	0.9092	0.9627	0.9421	0.9835	0.9614	0.9638	1.008	0.9538	1.2887	1.2745
Mn	0.0137	0.0146	0.0153	0.0156	0.0157	0.0156	0.0157	0.0148	0.0301	0.0289
Mg	1.5751	1.5603	1.5837	1.5432	1.5482	1.4944	0.9001	0.9125	0.6799	0.7428
Ca	0.5285	0.5015	0.4999	0.498	0.4949	0.5477	1.1473	1.1492	1.0044	0.9686
Total	8.0074	8.0146	8.0151	8.0168	7.9981	8.0105	8.0238	8.0075	7.9947	7.9997
Endmember
Alm	0.300413	0.316771	0.309799	0.323488	0.318323	0.318981	0.328221	0.314754	0.429123	0.422748
Prp	0.520436	0.513409	0.520783	0.507581	0.512615	0.494589	0.293087	0.301125	0.226399	0.246385
Spes	0.00452668	0.00480405	0.00503124	0.00513107	0.00519833	0.005163	0.00511217	0.004884	0.010023	0.00958604
Grs	0.174624	0.165016	0.164387	0.1638	0.163863	0.181268	0.373579	0.379236	0.334454	0.321282

## Sheet: Plag
Sample	BA7	BA7	BA7	BA7	BA3	BA3
Type	Gran.	Gran.	Gran.	Gran.	Gran.	Gran.
Mineral	Plg	Plg	Plg	Plg	Plg	Plg
SiO2	60.38	63.8	60.27	65.21	58.28	58.17
TiO2	0.0014	0.0041	0.0041	0.0003	0.0297	0.0145
Al2O3	25.88	22.93	24.6	22.3	26.46	26.35
FeO	0.1442	0.06	0.1514	0.1469	0.041	0.0376
MgO	0.0065	0.0014	0.0453	0.0077	0	0
CaO	6.71	3.43	6.14	2.85	8.06	8.06
Na2O	6.87	9.51	8.51	10.12	7	7.03
K2O	0.1147	0.348	0.1358	0.1616	0.2811	0.2638
Total	100.119	100.1	99.8812	100.812	100.167	99.9538
Structural formula (8 O)
Si	2.6751	2.815	2.6914	2.8515	2.6044	2.6056
Ti	0	0.0001	0.0001	0	0.001	0.0005
Al	1.3514	1.1924	1.2947	1.1493	1.3936	1.3911
Fe	0.0053	0.0022	0.0057	0.0054	0.0015	0.0014
Mg	0.0004	0.0001	0.003	0.0005	0	0
Ca	0.3185	0.1622	0.2938	0.1335	0.3859	0.3868
Na	0.5901	0.8136	0.7368	0.858	0.6065	0.6105
K	0.0065	0.0196	0.0077	0.009	0.016	0.0151
Endmember
Xab	0.6449	0.8174	0.7096	0.8575	0.6014	0.603
Xan	0.3481	0.1629	0.2829	0.1335	0.3827	0.3821
XK	0.0071	0.0197	0.0075	0.009	0.0159	0.0149

## Sheet: Epidote
Sample	BA7	BA7	BA7	BA7	BA7	BA7	BA7
Type	Compl. Text.	Compl. Text.	Compl. Text.	Pst	Pst	Compl. Text.	Compl. Text.
Mineral	Ep.	Ep.	Ep.	Ep.	Ep.	Ep.	Ep.
SiO2	39.3	39.35	38.29	39.4	40.01	39.08	39.28
TiO2	0.0672	0.0588	0.1446	0.0459	0.0422	0.1141	0.0596
Al2O3	31.86	33.18	26.13	31.78	31.89	31.41	31.87
Fe2O3	1.91436	0.778655	9.51615	2.39295	2.29278	2.87154	2.51538
MgO	0.0598	0.0279	0.0798	0.0493	0.0426	0.1591	0.0706
CaO	24.09	24.72	24.07	24.11	23.33	23.83	24.12
Na2O	0.0245	0.0382	0.0083	0.0124	0.0214	0.0688	0.0143
Total	97.3488	98.1575	98.3167	97.8064	97.653	97.594	97.9676
Structural formula (25 O)
Si	6.0494	5.9767	6.1314	6.0514	6.1261	6.0352	6.0295
Ti	0.0078	0.0067	0.0174	0.0053	0.0049	0.0133	0.0069
Al	5.7799	5.9395	4.9314	5.7526	5.7548	5.7169	5.7656
Fe	0.2214	0.0889	1.145	0.2762	0.2638	0.3332	0.2901
Mg	0.0137	0.0063	0.019	0.0113	0.0097	0.0366	0.0162
Ca	3.9731	4.0229	4.1297	3.9676	3.8274	3.9431	3.967
Na	0.0073	0.0112	0.0026	0.0037	0.0064	0.0206	0.0043
Compl. Text.: complex texture in the matrix.

## Sheet: Cpx
Sample	BA7	BA7	BA7	BA7	BA7	BA7	BA7	BA7	BA7
Type	Gran. Cpx	Gran. Cpx	Gran. Cpx	Omph.	Omph.	Omph.	Omph.	Omph.	Omph.
Mineral	Cpx	Cpx	Cpx	Cpx	Cpx	Cpx	Cpx	Cpx	Cpx
SiO2	47.93	47.83	47.71	54.43	53.9	53.93	54.77	53.7	54.42
TiO2	0.7993	1.5668	1.3515	0.1977	0.2643	0.3381	0.1554	0.1218	0.2506
Al2O3	12.74	11.71	11.73	10.97	12.11	10	10.7	11.49	12.46
FeO	4.38	4.75	5.44	3.24	3.46	3.97	3.46	4.77	3.44
MnO	0.0046	0.0285	0.0154	0.0097	0.0219	0.0433	0.0259	0.0218	0.0118
MgO	10.5	10.48	10.4	9.75	9.33	10.24	10.09	8.8	8.59
CaO	21.53	21.26	21.06	15.35	15.52	16.88	15.81	15.73	14.42
Na2O	2.16	2.24	2.23	5.9	5.62	5.03	5.34	5.54	6.31
Total	100.106	99.9487	100.002	99.868	100.243	100.452	100.364	100.203	99.9268
Structural formula 4 cations 6 oxygens
Si	1.7409	1.7459	1.7427	1.9327	1.9125	1.9186	1.943	1.9167	1.9319
Al IV	0.2591	0.2541	0.2573	0.0673	0.0875	0.0814	0.057	0.0833	0.0681
Al VI	0.2863	0.2497	0.2476	0.3918	0.419	0.3379	0.3904	0.4001	0.4532
Ti	0.0218	0.043	0.0371	0.0053	0.0071	0.009	0.0041	0.0033	0.0067
Fe3+	0.0814	0.0779	0.0935	0.0714	0.0414	0.0726	0.0259	0.0605	0.0361
Mg	0.5685	0.5703	0.5663	0.5161	0.4935	0.5431	0.5336	0.4682	0.4546
Fe2+	0.0516	0.0671	0.0727	0.0248	0.0613	0.0456	0.0768	0.0819	0.066
Mn	0.0001	0.0009	0.0005	0.0003	0.0007	0.0013	0.0008	0.0007	0.0004
Ca	0.8379	0.8315	0.8242	0.584	0.5901	0.6434	0.6009	0.6016	0.5485
Na	0.1521	0.1585	0.1579	0.4062	0.3866	0.3469	0.3673	0.3834	0.4343
Endmember
Acm	0.0809	0.0775	0.0925	0.0709	0.0408	0.0721	0.0254	0.06	0.0357
Jad	0.0703	0.0802	0.0638	0.3327	0.3402	0.2728	0.3348	0.3199	0.3938
Ti-Di	0.0217	0.0428	0.0367	0.0052	0.007	0.009	0.0041	0.0032	0.0066
Jo	0.0001	0.0009	0.0005	0.0003	0.0006	0.0013	0.0008	0.0007	0.0004
Ca-Tsc	0.2021	0.1567	0.1596	0.044	0.0432	0.0512	0.0092	0.0575	0.0321
Di+Hd	0.6127	0.6304	0.6253	0.5342	0.5387	0.5817	0.587	0.5398	0.5091
En+Fs	0.0122	0.0115	0.0216	0.0126	0.0294	0.012	0.0388	0.019	0.0223

## Sheet: Amph
Sample	BA7	BA7	BA7	BA7	BA7	BA7	BA7	BA7	BA7	BA7	BA7	BA7
Type	Cpx repl.	Cpx repl.	Cpx repl.	Cpx repl.	Cpx repl.	Cpx repl.	Cpx repl.	Cpx repl.	Cpx repl.	Cpx repl.	Cpx repl.	Cpx repl.
Mineral	Amph.	Amph.	Amph.	Amph.	Amph.	Amph.	Amph.	Amph.	Amph.	Amph.	Amph.	Amph.
SiO2	39.47	40.06	39.53	39.54	40.53	39.62	39.29	39.66	39.31	39.23	39.53	39.83
TiO2	0.9586	0.958	0.9726	0.8594	0.8732	0.6312	0.8758	1.0574	0.9075	0.8696	0.8868	0.9831
Al2O3	17.48	17.95	18.4	17.94	16.02	17.74	17.3	17.78	17.38	17.14	16.87	17.88
FeO	13.49	12.63	13.19	13.82	13.18	12.81	14.38	12.46	12.98	14.21	14.36	12.79
MgO	8.9	9.13	8.71	8.9	10.32	9.49	8.18	9.25	9.2	8.4	8.28	9.3
CaO	10.85	11.09	10.69	11	11.7	11.44	10.34	10.53	10.83	10.68	10.79	11.32
Na2O	1.96	2.09	2.32	2.24	1.94	2.03	2.12	2.1	2.03	1.89	2	1.93
K2O	2.91	1.96	2.27	1.92	2.13	2.07	3.08	2.84	2.68	3.11	2.61	2.22
Cl	2.26	1.48	1.65	1.35	1.12	1.57	2.57	1.95	2.15	2.55	2.56	1.57
Total corrected for Cl	97.7686	97.018	97.3626	97.2694	97.5632	97.0512	97.5558	97.1874	96.9775	97.4996	97.3068	97.4731
Structural formula (AB2C5T8O22W2; calculation based on Locock, 2014)
Si (T site)	6.003	6.037	5.973	5.975	6.096	5.997	6.032	6.014	6.005	6.026	6.072	5.998
Al (T site)	1.997	1.963	2.027	2.025	1.904	2.003	1.968	1.986	1.995	1.974	1.928	2.002
Ti (C site)	0.11	0.109	0.111	0.098	0.099	0.072	0.101	0.121	0.104	0.1	0.102	0.111
Al (C site)	1.137	1.225	1.25	1.17	0.936	1.161	1.163	1.191	1.134	1.129	1.126	1.172
Fe3+ (C site)				0.034	0.012
Fe2+ (C site)	1.716	1.592	1.667	1.694	1.64	1.622	1.846	1.58	1.658	1.825	1.845	1.611
Mg (C site)	2.018	2.051	1.962	2.005	2.314	2.141	1.872	2.091	2.095	1.924	1.896	2.088
Ca (B site)	1.768	1.791	1.731	1.781	1.886	1.855	1.701	1.711	1.773	1.758	1.776	1.827
Na (B site)	0.232	0.209	0.269	0.2	0.108	0.145	0.299	0.289	0.227	0.242	0.224	0.173
Na (A site)	0.346	0.401	0.41	0.456	0.458	0.451	0.332	0.328	0.374	0.321	0.371	0.39
K (A site)	0.565	0.377	0.438	0.37	0.409	0.4	0.603	0.549	0.522	0.609	0.511	0.427
OH (W site)	1.417	1.622	1.577	1.654	1.715	1.597	1.331	1.499	1.443	1.336	1.334	1.599
Cl (W site)	0.583	0.378	0.423	0.346	0.285	0.403	0.669	0.501	0.557	0.664	0.666	0.401
